# Supplementary material for: Deregulation of lysophosphatidic acid metabolism in oral cancer promotes cell migration via the up-regulation of COX-2
Source: PeerJ journal article supplement (doi:10.7717/peerj.10328), 2020-11-11
Supplement: Figure_S1.pdf [file Figure_S1.pdf]

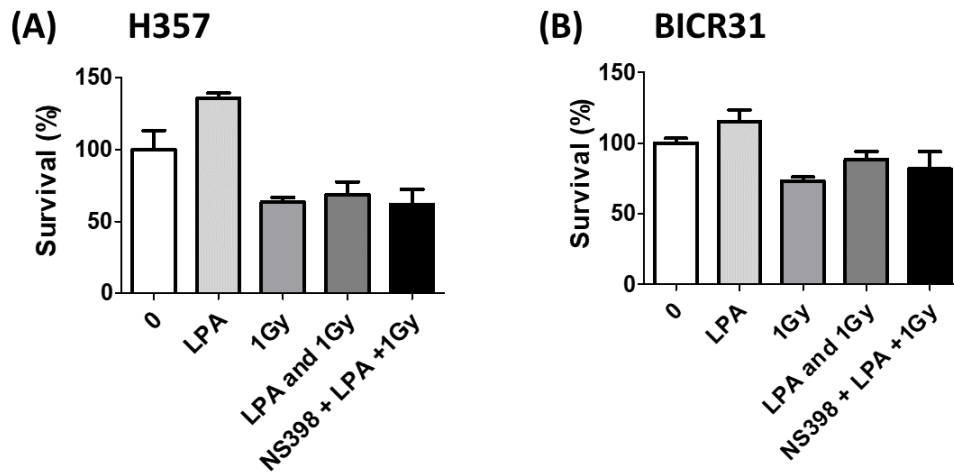

**Figure S1. NS398 did not reverse the effects of LPA in irradiated OSCC cells**  
 (A) H357 or (B) BICR31 cells were pre-treated with LPA (10 $\mu$ M) for one hour prior to treatment with 10  $\mu$ M NS-398 for a further one hour prior to irradiation (1 Gy). Results are expressed as percentage of cells surviving compared to untreated controls (100%) .
