# Supplementary material for: Deregulation of lysophosphatidic acid metabolism in oral cancer promotes cell migration via the up-regulation of COX-2
Source: PeerJ. 2020 Nov 11;8:e10328. doi: 10.7717/peerj.10328 (PMC7666559; doi:10.7717/peerj.10328)
Supplement: Supplemental Information 2 [file peerj-08-10328-s002.xlsx]

## Sheet: 2C 
2C
H357p13
0uM	area1	area2	area3	area4	area5	area6	average	average (well1-3)	SD	std error of mean (SEM)	% migration	migration (SD)	migration (SEM)			% migration	% SD
well1	18	15	17	13	25	38	21	22.8333	1.69148	0.976578	100.015	7.40903	4.27761		0µM	100	7.41
well2	21	24	13	40	27	21	24.3333								10.0µM	193.95	39.8
well3	16	33	36	16	22	16	23.1667
H357p13													error bar
10.0uM	area1	area2	area3	area4	area5	area6	average	average (well1-3)	SD	std error of mean (SEM)	% migration	migration (SD)	migration (SEM)
well1	41	43	36	48	54	42	44	44.2778	9.08652	5.2461	193.946	39.8008	22.979
well2	34	48	28	37	32	33	35.3333
well3	67	60	38	54	60	42	53.5
H376p33												error bar
0uM	area1	area2	area3	area4	area5	area6	average	average (well1-3)	SD	std error of mean (SEM)	% migration	migration (SD)	migration (SEM)			% migration	migration (SD)
well1	45	27	32	33	40	28	34.1667	36.8889	2.37073	1.36874	99.997	6.42649	3.71034		0µM	100	6.43
well2	42	33	43	43	44	26	38.5								10.0µM	203.01	14.29
well3	34	42	37	29	36	50	38
												error bar
10.0uM	area1	area2	area3	area4	area5	area6	average	average (well1-3)	SD	std error of mean (SEM)	% migration	migration (SD)	migration (SEM)
well1	68	73	85	79	79	91	79.1667	74.8889	5.27134	3.04341	203.006	14.2893	8.24996
well2	65	74	69	71	64	71	69
well3	77	82	73	79	77	71	76.5

## Sheet: 2D 
H357p13
0uM No treatment, with vehicle control											error bar
0µM	area1	area2	area3	area4	area5	average	average (well1-3)	SD	(SEM)	% migration	migration (SD)	migration (SEM)			% Invasion	Invasion (SD)
well1	22	21	26	28	30	25.4	45.3333	17.39	10.0401	100	38.3604	22.1474		0µM	100	38.36
well2	47	45	66	73	56	57.4								LPA 10µM	186.765	14.27
well3	53	49	42	75	47	53.2
											error bar
LPA 10µM	area1	area2	area3	area4	area5	average	average (well1-3)	SD	(SEM)	% migration	migration (SD)	migration (SEM)
well1	87	66	65	78	90	77.2	84.6667	6.46942	3.73512	186.765	14.2708	8.23923
well2	92	83	101	81	84	88.2
well3	87	95	89	79	93	88.6

## Sheet: 3A H357
H357p9 set2		PE=(number of colonies counted/no of colonies plated)x100
		SF= (PE of treated sample/PE of control)x100
		SD of PE = (SD of no of colonies/no of cells plated)*100
		SD of SF = (SD of PE/PE of control)*100
Dose	# cells plated	# colonies	mean of colonies	PE	mean PE	Surviving fraction	SD of colonies	SD of PE	SD of SF		Dose	Surviving fraction	SD of SF
0	300	115	112.667	38.3333	37.5556	99.9988	2.51661	0.83887	2.23365		0	99.9988	2.23365
		110		36.6667							LPA	102.662	1.84761
		113		37.6667							1Gy	59.1709	5.20065
LPA	300	114	115.667	38	38.5556	102.662	2.08167	0.693889	1.84761		LPA and 1Gy	82.2475	4.88832
		115		38.3333
		118		39.3333
1Gy	300	71	66.6667	23.6667	22.2222	59.1709	5.85947	1.95316	5.20065
		69		23
		60		20
LPA and 1Gy	300	90	92.6667	30	30.8889	82.2475	5.50757	1.83586	4.88832
		99		33
		89		29.6667

## Sheet: 3B BICR31
BICR31/21		PE=(number of colonies counted/no of colonies plated)x100
		SF= (PE of treated sample/PE of control)x100
		SD of PE = (SD of no of colonies/no of cells plated)*100
		SD of SF = (SD of PE/PE of control)*100
Dose	# cells plated	# colonies	Mean of colonies	PE	mean PE	Surviving fraction	SD of colonies	SD of PE	SD of SF		Dose	Surviving fraction
0	300	53	52.3333	17.6667	17.4444	100.003	2.08167	0.693889	3.97872		0	100.003	3.97796
		54		18							LPA	124.235	3.8219
		50		16.6667							1Gy	93.0173	3.97796
LPA	300	65	65	21.6667	21.6667	124.235	2	0.666667	3.82263		LPA and 1Gy	128.058	11.9362
		63		21
		67		22.3333
1Gy	300	48	48	16	16.2222	93.0173	2.08167	0.693889	3.97872
		51		17
		47		15.6667
LPA and 1Gy	300	72	67	24	22.3333	128.058	6.245	2.08167	11.9362
		69		23
		60		20

## Sheet: 4A H357
Block Type	96fast
Chemistry	TAQMAN
Experiment File Name	C:\Documents and Settings\INSTR-ADMIN\Desktop\MayLeng\240820_COX2.eds
Experiment Run End Time	2020-08-24 13:48:27 PM SGT
Instrument Type	sds7500fast
Passive Reference	ROX
Well	Sample Name	Target Name	Task	Reporter	Quencher	RQ	RQ Min	RQ Max	Cт	Cт Mean	Cт SD	ΔCт	ΔCт Mean	ΔCт SD	HK Control ΔCт Mean	HK Control ΔCт SD	ΔΔCт	Automatic Ct Threshold	Ct Threshold	Automatic Baseline	Baseline Start	Baseline End	Efficiency	Comments
A8	H357_1h-_2	COX-2	UNKNOWN	FAM	NFQ-MGB	1	0.967321	1.03378	29.1491	29.2803	0.119745	8.07796	8.12528	0.0479333			0	TRUE	0.55777	TRUE	3	21	1
B8	H357_1h-_2	COX-2	UNKNOWN	FAM	NFQ-MGB	1	0.967321	1.03378	29.308	29.2803	0.119745	8.1738	8.12528	0.0479333			0	TRUE	0.55777	TRUE	3	23	1
C8	H357_1h-_2	COX-2	UNKNOWN	FAM	NFQ-MGB	1	0.967321	1.03378	29.3837	29.2803	0.119745	8.12409	8.12528	0.0479333			0	TRUE	0.55777	TRUE	3	22	1
D8	H357_1h+_2	COX-2	UNKNOWN	FAM	NFQ-MGB	19.5207	19.0535	19.9994	24.9917	24.9722	0.0215018	3.8772	3.83835	0.0349501			-4.28693	TRUE	0.55777	TRUE	3	19	1
E8	H357_1h+_2	COX-2	UNKNOWN	FAM	NFQ-MGB	19.5207	19.0535	19.9994	24.9491	24.9722	0.0215018	3.80947	3.83835	0.0349501			-4.28693	TRUE	0.55777	TRUE	3	18	1
F8	H357_1h+_2	COX-2	UNKNOWN	FAM	NFQ-MGB	19.5207	19.0535	19.9994	24.9757	24.9722	0.0215018	3.82837	3.83835	0.0349501			-4.28693	TRUE	0.55777	TRUE	3	18	1
A9	H357_2h+_2	COX-2	UNKNOWN	FAM	NFQ-MGB	9.27977	8.86358	9.71549	25.2751	25.4225	0.128636	4.97512	4.91119	0.0661987			-3.21409	TRUE	0.55777	TRUE	3	19	1
B9	H357_2h+_2	COX-2	UNKNOWN	FAM	NFQ-MGB	9.27977	8.86358	9.71549	25.512	25.4225	0.128636	4.84294	4.91119	0.0661987			-3.21409	TRUE	0.55777	TRUE	3	19	1
C9	H357_2h+_2	COX-2	UNKNOWN	FAM	NFQ-MGB	9.27977	8.86358	9.71549	25.4805	25.4225	0.128636	4.91552	4.91119	0.0661987			-3.21409	TRUE	0.55777	TRUE	3	19	1
A8	H357_1h-_2	GAPDH	UNKNOWN	VIC	NFQ-MGB				21.0711	21.155	0.0959499							TRUE	0.202669	TRUE	3	16	1
B8	H357_1h-_2	GAPDH	UNKNOWN	VIC	NFQ-MGB				21.1342	21.155	0.0959499							TRUE	0.202669	TRUE	3	16	1
C8	H357_1h-_2	GAPDH	UNKNOWN	VIC	NFQ-MGB				21.2596	21.155	0.0959499							TRUE	0.202669	TRUE	3	16	1
D8	H357_1h+_2	GAPDH	UNKNOWN	VIC	NFQ-MGB				21.1145	21.1338	0.0171829							TRUE	0.202669	TRUE	3	15	1
E8	H357_1h+_2	GAPDH	UNKNOWN	VIC	NFQ-MGB				21.1396	21.1338	0.0171829							TRUE	0.202669	TRUE	3	16	1
F8	H357_1h+_2	GAPDH	UNKNOWN	VIC	NFQ-MGB				21.1473	21.1338	0.0171829							TRUE	0.202669	TRUE	3	15	1
A9	H357_2h+_2	GAPDH	UNKNOWN	VIC	NFQ-MGB				20.3	20.5114	0.190287							TRUE	0.202669	TRUE	3	14	1
B9	H357_2h+_2	GAPDH	UNKNOWN	VIC	NFQ-MGB				20.6691	20.5114	0.190287							TRUE	0.202669	TRUE	3	15	1
C9	H357_2h+_2	GAPDH	UNKNOWN	VIC	NFQ-MGB				20.565	20.5114	0.190287							TRUE	0.202669	TRUE	3	15	1
Analysis Type	Multiplex
Endogenous Control	GAPDH
RQ Min/Max Standard Deviations	1
Reference Sample	H357_1h-_2

## Sheet: 4A H376
Block Type	96fast
Chemistry	TAQMAN
Experiment File Name	C:\Documents and Settings\INSTR-ADMIN\Desktop\MayLeng\240820_COX2.eds
Experiment Run End Time	2020-08-24 13:48:27 PM SGT
Instrument Type	sds7500fast
Passive Reference	ROX
Well	Sample Name	Target Name	Task	Reporter	Quencher	RQ	RQ Min	RQ Max	Cт	Cт Mean	Cт SD	ΔCт	ΔCт Mean	ΔCт SD	HK Control ΔCт Mean	HK Control ΔCт SD	ΔΔCт	Automatic Ct Threshold	Ct Threshold	Automatic Baseline	Baseline Start	Baseline End	Efficiency	Comments
A6	H376_1h-_2	COX-2	UNKNOWN	FAM	NFQ-MGB	1	0.956843	1.0451	29.4066	29.3378	0.0943438	8.85497	8.92381	0.0636466			0	TRUE	0.55777	TRUE	3	22	1
B6	H376_1h-_2	COX-2	UNKNOWN	FAM	NFQ-MGB	1	0.956843	1.0451	29.2302	29.3378	0.0943438	8.93595	8.92381	0.0636466			0	TRUE	0.55777	TRUE	3	22	1
C6	H376_1h-_2	COX-2	UNKNOWN	FAM	NFQ-MGB	1	0.956843	1.0451	29.3764	29.3378	0.0943438	8.98051	8.92381	0.0636466			0	TRUE	0.55777	TRUE	3	22	1
D6	H376_1h+_2	COX-2	UNKNOWN	FAM	NFQ-MGB	7.60542	7.53389	7.67763	26.548	26.5321	0.0156777	6.00973	5.99678	0.0136328			-2.92703	TRUE	0.55777	TRUE	3	19	1
E6	H376_1h+_2	COX-2	UNKNOWN	FAM	NFQ-MGB	7.60542	7.53389	7.67763	26.5166	26.5321	0.0156777	5.98255	5.99678	0.0136328			-2.92703	TRUE	0.55777	TRUE	3	20	1
F6	H376_1h+_2	COX-2	UNKNOWN	FAM	NFQ-MGB	7.60542	7.53389	7.67763	26.5316	26.5321	0.0156777	5.99807	5.99678	0.0136328			-2.92703	TRUE	0.55777	TRUE	3	20	1
D7	H376_2h+_2	COX-2	UNKNOWN	FAM	NFQ-MGB	6.87954	6.58539	7.18683	26.7909	26.7466	0.0416859	6.2141	6.1415	0.0630432			-2.78231	TRUE	0.55777	TRUE	3	21	1
E7	H376_2h+_2	COX-2	UNKNOWN	FAM	NFQ-MGB	6.87954	6.58539	7.18683	26.7081	26.7466	0.0416859	6.10055	6.1415	0.0630432			-2.78231	TRUE	0.55777	TRUE	3	20	1
F7	H376_2h+_2	COX-2	UNKNOWN	FAM	NFQ-MGB	6.87954	6.58539	7.18683	26.7407	26.7466	0.0416859	6.10984	6.1415	0.0630432			-2.78231	TRUE	0.55777	TRUE	3	20	1
A6	H376_1h-_2	GAPDH	UNKNOWN	VIC	NFQ-MGB				20.5517	20.4139	0.129648							TRUE	0.202669	TRUE	3	15	1
B6	H376_1h-_2	GAPDH	UNKNOWN	VIC	NFQ-MGB				20.2943	20.4139	0.129648							TRUE	0.202669	TRUE	3	14	1
C6	H376_1h-_2	GAPDH	UNKNOWN	VIC	NFQ-MGB				20.3959	20.4139	0.129648							TRUE	0.202669	TRUE	3	14	1
D6	H376_1h+_2	GAPDH	UNKNOWN	VIC	NFQ-MGB				20.5383	20.5353	0.00257703							TRUE	0.202669	TRUE	3	15	1
E6	H376_1h+_2	GAPDH	UNKNOWN	VIC	NFQ-MGB				20.5341	20.5353	0.00257703							TRUE	0.202669	TRUE	3	15	1
F6	H376_1h+_2	GAPDH	UNKNOWN	VIC	NFQ-MGB				20.5336	20.5353	0.00257703							TRUE	0.202669	TRUE	3	15	1
D7	H376_2h+_2	GAPDH	UNKNOWN	VIC	NFQ-MGB				20.5768	20.6051	0.0271432							TRUE	0.202669	TRUE	3	15	1
E7	H376_2h+_2	GAPDH	UNKNOWN	VIC	NFQ-MGB				20.6075	20.6051	0.0271432							TRUE	0.202669	TRUE	3	15	1
F7	H376_2h+_2	GAPDH	UNKNOWN	VIC	NFQ-MGB				20.6309	20.6051	0.0271432							TRUE	0.202669	TRUE	3	15	1
Analysis Type	Multiplex
Endogenous Control	GAPDH
RQ Min/Max Standard Deviations	1
Reference Sample	H376_1h-_2

## Sheet: 4A BICR31
Block Type	96fast
Chemistry	TAQMAN
Experiment File Name	C:\Documents and Settings\INSTR-ADMIN\Desktop\MayLeng\240820_COX2.eds
Experiment Run End Time	2020-08-24 13:48:27 PM SGT
Instrument Type	sds7500fast
Passive Reference	ROX
Well	Sample Name	Target Name	Task	Reporter	Quencher	RQ	RQ Min	RQ Max	Cт	Cт Mean	Cт SD	ΔCт	ΔCт Mean	ΔCт SD	HK Control ΔCт Mean	HK Control ΔCт SD	ΔΔCт	Automatic Ct Threshold	Ct Threshold	Automatic Baseline	Baseline Start	Baseline End	Efficiency	Comments
D9	BICR31_1h-_2	COX-2	UNKNOWN	FAM	NFQ-MGB	1	0.974522	1.02614	28.9453	28.9545	0.0102199	7.65556	7.61313	0.0372339			0	TRUE	0.55777	TRUE	3	22	1
E9	BICR31_1h-_2	COX-2	UNKNOWN	FAM	NFQ-MGB	1	0.974522	1.02614	28.9528	28.9545	0.0102199	7.58589	7.61313	0.0372339			0	TRUE	0.55777	TRUE	3	22	1
F9	BICR31_1h-_2	COX-2	UNKNOWN	FAM	NFQ-MGB	1	0.974522	1.02614	28.9655	28.9545	0.0102199	7.59795	7.61313	0.0372339			0	TRUE	0.55777	TRUE	3	22	1
A10	BICR31_1h+_2	COX-2	UNKNOWN	FAM	NFQ-MGB	4.45199	4.36501	4.54071	27.0206	27.0206	0.00738435	5.45609	5.45868	0.028467			-2.15445	TRUE	0.55777	TRUE	3	20	1
B10	BICR31_1h+_2	COX-2	UNKNOWN	FAM	NFQ-MGB	4.45199	4.36501	4.54071	27.028	27.0206	0.00738435	5.48836	5.45868	0.028467			-2.15445	TRUE	0.55777	TRUE	3	21	1
C10	BICR31_1h+_2	COX-2	UNKNOWN	FAM	NFQ-MGB	4.45199	4.36501	4.54071	27.0132	27.0206	0.00738435	5.4316	5.45868	0.028467			-2.15445	TRUE	0.55777	TRUE	3	20	1
D10	BICR31_2h+_2	COX-2	UNKNOWN	FAM	NFQ-MGB	3.87242	3.82282	3.92265	26.8378	26.9008	0.0717262	5.63846	5.6599	0.0185954			-1.95323	TRUE	0.55777	TRUE	3	20	1
E10	BICR31_2h+_2	COX-2	UNKNOWN	FAM	NFQ-MGB	3.87242	3.82282	3.92265	26.8857	26.9008	0.0717262	5.66961	5.6599	0.0185954			-1.95323	TRUE	0.55777	TRUE	3	20	1
F10	BICR31_2h+_2	COX-2	UNKNOWN	FAM	NFQ-MGB	3.87242	3.82282	3.92265	26.9789	26.9008	0.0717262	5.67163	5.6599	0.0185954			-1.95323	TRUE	0.55777	TRUE	3	20	1
D9	BICR31_1h-_2	GAPDH	UNKNOWN	VIC	NFQ-MGB				21.2897	21.3414	0.0447313							TRUE	0.202669	TRUE	3	16	1
E9	BICR31_1h-_2	GAPDH	UNKNOWN	VIC	NFQ-MGB				21.3669	21.3414	0.0447313							TRUE	0.202669	TRUE	3	16	1
F9	BICR31_1h-_2	GAPDH	UNKNOWN	VIC	NFQ-MGB				21.3676	21.3414	0.0447313							TRUE	0.202669	TRUE	3	16	1
A10	BICR31_1h+_2	GAPDH	UNKNOWN	VIC	NFQ-MGB				21.5645	21.5619	0.0211164							TRUE	0.202669	TRUE	3	16	1
B10	BICR31_1h+_2	GAPDH	UNKNOWN	VIC	NFQ-MGB				21.5396	21.5619	0.0211164							TRUE	0.202669	TRUE	3	16	1
C10	BICR31_1h+_2	GAPDH	UNKNOWN	VIC	NFQ-MGB				21.5816	21.5619	0.0211164							TRUE	0.202669	TRUE	3	15	1
D10	BICR31_2h+_2	GAPDH	UNKNOWN	VIC	NFQ-MGB				21.1994	21.2409	0.05806							TRUE	0.202669	TRUE	3	16	1
E10	BICR31_2h+_2	GAPDH	UNKNOWN	VIC	NFQ-MGB				21.2161	21.2409	0.05806							TRUE	0.202669	TRUE	3	15	1
F10	BICR31_2h+_2	GAPDH	UNKNOWN	VIC	NFQ-MGB				21.3072	21.2409	0.05806							TRUE	0.202669	TRUE	3	16	1
Analysis Type	Multiplex
Endogenous Control	GAPDH
RQ Min/Max Standard Deviations	1
Reference Sample	BICR31_1h-_2

## Sheet: 4B
Cell	Time (h)	COX-2	β-actin	COX-2/β-actin	Normalise to 0 h
H376	0	441.042	23287	0.0189394	1
	1	4029.66	23377.6	0.172372	9.10127
	2	11609.2	24343.9	0.476881	25.1794
	4	19161.7	26476.9	0.723715	38.2122
H357	0	957.669	26388.6	0.036291	1
	1	3300.48	24621.6	0.134048	3.6937
	2	8430.17	22196.2	0.379803	10.4655
	4	14382.1	21436.5	0.670916	18.4871
BICR31	0	2580.49	28600.5	0.0902253	1
	1	5860.03	28972.3	0.202263	2.24176
	2	12686.3	33318	0.380763	4.22014
	4	10748.3	33468	0.32115	3.55942

## Sheet: 4C
H357p6 with10uM LPA and 10uM NS398
											error bar				error bar
0uM	area1	area2	area3	area4	area5	average	average (well1-3)	SD	(SEM)	% migration	migration (SD)			% migration	migration (SD)
well1	42	46	56	53	46	48.6	45	5.07149	2.92803	100	11.27		0µM	100	11.27
well2	58	50	2	48	38	39.2							10uM LPA	194.963	1.12
well3	4	67	67	43	55	47.2							10uM NS398	89.7407	10.39
													10uM LPA &10uM NS398	81.3333	8.04
											error bar
10uM LPA	area1	area2	area3	area4	area5	average	average (well1-3)	SD	(SEM)	% migration	migration (SD)
well1	84	97	89	86	85	88.2	87.7333	0.503322	0.290593	194.963	1.11849
well2	93	85	89	83	86	87.2
well3	85	100	94	81	79	87.8
											error bar
10uM NS398	area1	area2	area3	area4	area5	average	average (well1-3)	SD	(SEM)	% migration	migration (SD)
well1	37	40	49	45	49	45.75	40.3833	4.67449	2.69882	89.7407	10.3877
well2	37	39	38	39	38	38.2
well3	35	29	37	43	42	37.2
											error bar
10uM LPA &10uM NS398	area1	area2	area3	area4	area5	average	average (well1-3)	SD	(SEM)	% migration	migration (SD)
well1	33	31	44	47	45	40	36.6	3.61663	2.08806	81.3333	8.03695
well2	41	37	41	33	33	37
well3	31	29	38	33	33	32.8
H376p14											error bar
0µM	area1	area2	area3	area4	area5	average	average (well1-3)	SD	(SEM)	% migration	migration (SD)			% migration	migration (SD)
well1	84	79	80	78	73	78.8	80.1333	1.66533	0.96148	100	2.0782		0µM	100	2.08
well2	76	71	80	86	85	79.6							10µM LPA	201.913	6.92118
well3	86	72	85	83	84	82							10µM NS398	103.993	0.63
													10µM LPA &10µM NS398	146.589	11.01
H376p14											error bar
10µM LPA	area1	area2	area3	area4	area5	average	average (well1-3)	SD	(SEM)	% migration	migration (SD)
well1	154	148	160	144	171	155.4	161.8	5.54617	3.20208	201.913	6.92118
well2	170	162	169	160	165	165.2
well3	166	153	155	175	175	164.8
H376p14											error bar
10µM NS398	area1	area2	area3	area4	area5	average	average (well1-3)	SD	(SEM)	% migration	migration (SD)
well1	102	86	79	77	75	83.8	83.3333	0.503322	0.290593	103.993	0.628106
well2	65	102	86	80	81	82.8
well3	100	81	90	72	74	83.4
H376p14											error bar
10µM LPA &10µM NS398	area1	area2	area3	area4	area5	average	average (well1-3)	SD	(SEM)	% migration	migration (SD)
well1	133	90	107	110	108	109.6	117.467	8.81892	5.09161	146.589	11.0053
well2	118	122	111	108	120	115.8
well3	141	136	116	119	123	127
